# Supplementary material for: Cationic polymerization of isobutyl vinyl ether in aqueous media: physical chemistry tricks to fight against thermal runaway
Source: Royal Society of Chemistry journal article supplement (doi:10.1039/c2py20945d), 2012-12-21
Supplement: c2py20945d.pdf [file c2py20945d.pdf]

## Supplementary Material

### Cationic polymerization of isobutyl vinyl ether in aqueous media: physical chemistry tricks to fight against thermal runaway

Alexei V. Radchenko,<sup>a</sup> Sergei V. Kostjuk\*<sup>a</sup> and Francois Ganachaud<sup>b,c</sup>

<sup>a</sup>Research Institute for Physical Chemical Problems of the Belarusian State University, 14 Leningradskaya St., 220030 Minsk, Belarus.

<sup>b</sup> INSA-Lyon, IMP, UMR5223, F-69621, Villeurbanne, France

<sup>c</sup> Université de Lyon, F-69622, Lyon, France

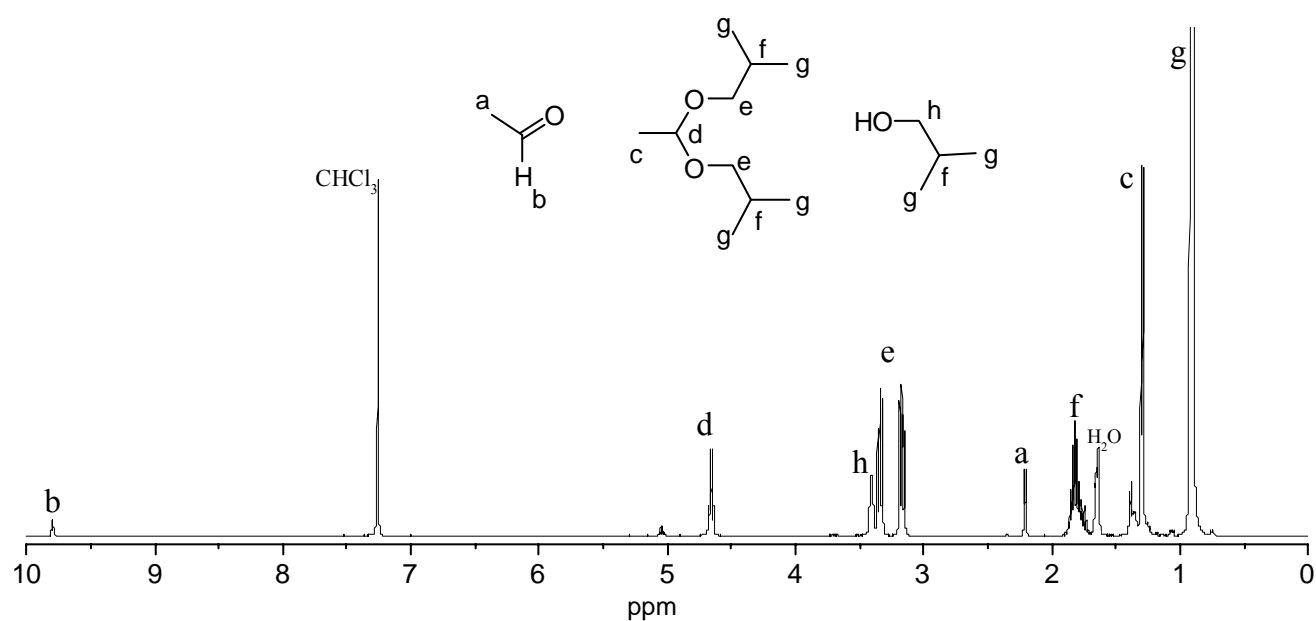

**Figure S1.** <sup>1</sup>H NMR spectrum of the reaction mixture (organic phase) after IBVE polymerization with DBSA at 20 °C (run 2, Table 1)

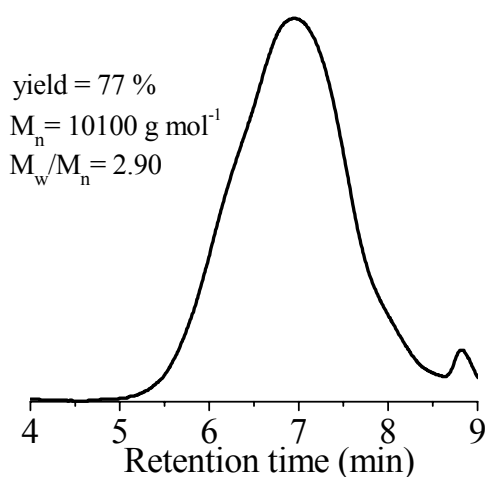

**Figure S2.** SEC trace of poly(isobutyl vinyl ether) synthesized in with  $\text{BF}_3\text{OEt}_2$  as a catalyst *n*-hexane at 0 °C: IBVE: 1 mL; *n*-hexane: 1 mL;  $\text{BF}_3\text{OEt}_2$ : 0.055 g; reaction time: 4 min. Terminal groups: acetal: 45.6%; aldehyde: 31.9%; alkenal: 4.9%; internal double bond (per chain): 0.56.

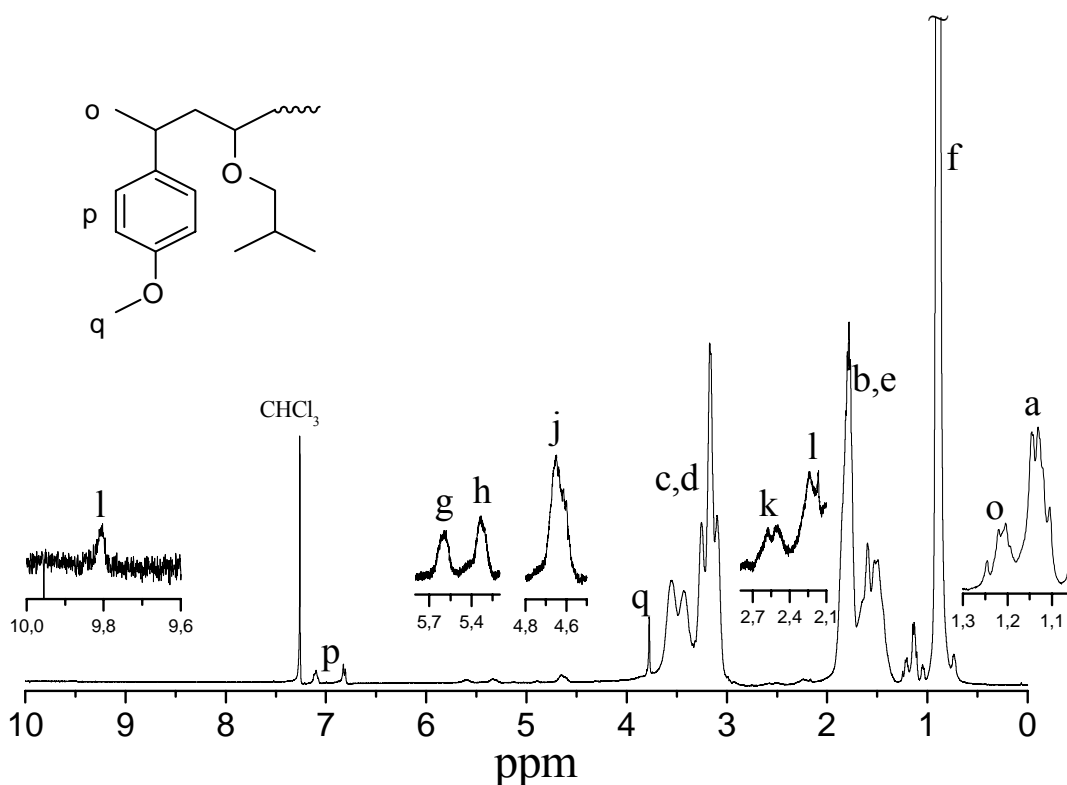

**Figure S3.**  $^1\text{H}$  NMR spectrum of poly(isobutyl vinyl ether) synthesized with 1-(4-methoxyphenylethanol)/ $\text{BF}_3\text{OEt}_2$  initiating system in aqueous dispersion at 0 °C (run 14, Table 3).

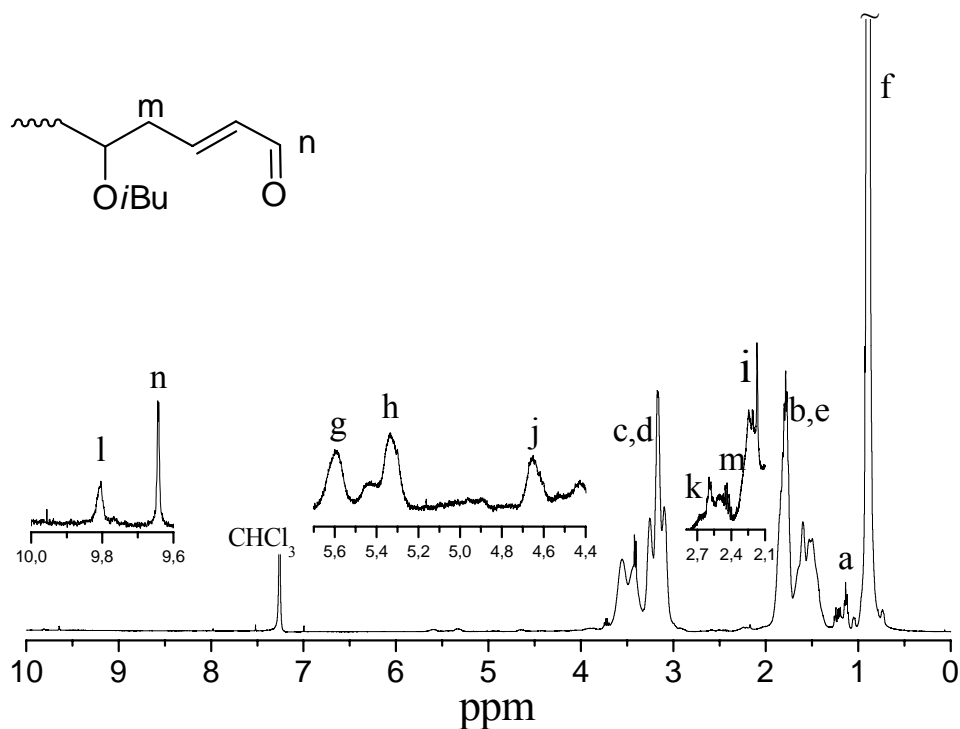

**Figure S4.** <sup>1</sup>H NMR spectrum of poly(isobutyl vinyl ether) synthesized with BF<sub>3</sub>OEt<sub>2</sub> as co-initiator in aqueous dispersion at 0 °C: V(H<sub>2</sub>O)=1ml, V(IBVE)=1ml, V(Hex)=1ml, m(BF<sub>3</sub>OEt<sub>2</sub>)=0.028g. M<sub>n</sub>(SEC)=7530 g mol<sup>-1</sup>, M<sub>w</sub>/M<sub>n</sub>=3.36, Yield=96%.

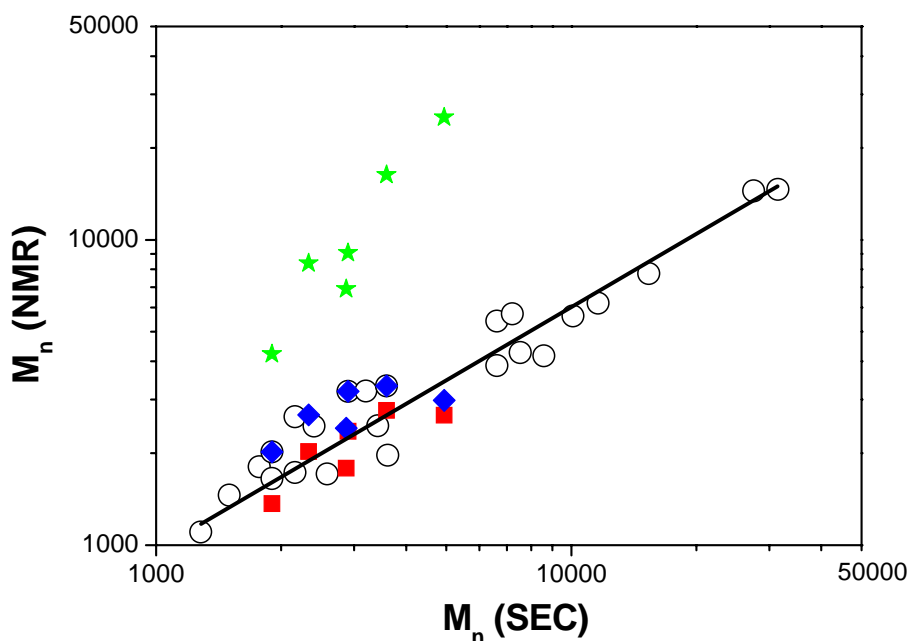

**Figure S5.** Correspondence between average molar masses of poly(isobutyl vinyl ether)s as determined by SEC and <sup>1</sup>H NMR spectrum from  $\alpha$ -chain ends for experiments done in absence (○) or in presence (◆, ★, ■) of pMOS-OH, assuming  $\alpha$ -chain ends arising uniquely from water, uniquely from pMOS-OH, or from both, respectively.

**Table S1.** Test of Stability of Non-Polymerizing IBVE Direct Emulsions (Without n-Hexane)

| Entry | DBSA-Na<br>(%) | Brij 35<br>(%) | Brij 78<br>(%) | Rewopol HV2<br>(%) | Visual stability<br>(min) |
|-------|----------------|----------------|----------------|--------------------|---------------------------|
| 1     | 2              | 2              |                |                    | 0                         |
| 2     | 2              | 4              |                |                    | 1                         |
| 3     | 2              | 11             |                |                    | 15                        |
| 4     | 2              |                | 6              |                    | 5                         |
| 5     | 2              |                | 14             |                    | 10                        |
| 6     | 2              |                |                | 6                  | 10                        |
| 7     | 2              | 8              | 4              |                    | 35                        |
| 8     |                | 8              |                | 6                  | > 120                     |
